# Supplementary material for: Anisotropic exchange interaction and field-induced SMM behaviour in a mixed valence {CoII4CoIII2} complex
Source: Royal Society of Chemistry journal article supplement (doi:10.1039/d0dt03075a), 2021-01-01
Supplement: d0dt03075a1.pdf [file d0dt03075a1.pdf]

## Supplementary Information

### **Anisotropic exchange interaction and field-induced SMM behaviour in a mixed valence $\{\text{Co}^{\text{II}}_4\text{Co}^{\text{III}}_2\}$ complex**

**Daiana Cabrosi<sup>[a]</sup>, Carlos Cruz<sup>[b],[c]</sup>, Verónica Paredes-García<sup>[b],[c]</sup> and Pablo Alborés<sup>[a]\*</sup>**

[a] Departamento de Química Inorgánica, Analítica y Química Física/ INQUIMAE (CONICET), Facultad de Ciencias Exactas y Naturales Universidad de Buenos Aires, Pabellón 2, Ciudad Universitaria, C1428EHA Buenos Aires, Argentina  
Fax: +5411 / 4576-3341

E-mail: [albores@qi.fcen.uba.ar](mailto:albores@qi.fcen.uba.ar)

[b] Departamento de Ciencias Químicas, Facultad de Ciencias Exactas, Universidad Andres Bello, Avenida República 275, Santiago de Chile, Chile.

[c] Centro para el Desarrollo de la Nanociencia y Nanotecnología, CEDENNA, Santiago, Chile.

**Table SI1.** Best fitting parameters of complex **1** AC susceptibility data at 1500 Oe according to the generalized Debye model.

| $T/ \text{K}$ | $\chi_s/\text{cm}^3\text{mol}^{-1}$ | $\chi_T/\text{cm}^3\text{mol}^{-1}$ | $\alpha$ | $\tau/ \text{s}$ |
|---------------|-------------------------------------|-------------------------------------|----------|------------------|
| 2.00          | 0.257                               | 0.777                               | 0.374    | 9.44E-05         |
| 2.16          | 0.203                               | 0.766                               | 0.466    | 6.18E-05         |
| 2.34          | 0.214                               | 0.738                               | 0.463    | 5.11E-05         |
| 2.53          | 0.202                               | 0.722                               | 0.501    | 4.02E-05         |
| 2.73          | 0.217                               | 0.669                               | 0.471    | 2.77E-05         |
| 2.95          | 0.260                               | 0.628                               | 0.425    | 2.58E-05         |
| 3.19          | 0.243                               | 0.612                               | 0.477    | 1.75E-05         |
| 3.45          | 0.278                               | 0.594                               | 0.484    | 1.89E-05         |

**Table SI2.** Best fitting parameters of complex **1** AC susceptibility data at 3000 Oe according to the generalized Debye model.

| $T/ \text{K}$ | $\chi_s/\text{cm}^3\text{mol}^{-1}$ | $\chi_T/\text{cm}^3\text{mol}^{-1}$ | $\alpha$ | $\tau/ \text{s}$ |
|---------------|-------------------------------------|-------------------------------------|----------|------------------|
| 2.00          | 0.161                               | 0.681                               | 0.575    | 7.91E-04         |
| 2.16          | 0.181                               | 0.628                               | 0.534    | 5.13E-04         |
| 2.34          | 0.144                               | 0.656                               | 0.608    | 4.03E-04         |
| 2.53          | 0.185                               | 0.644                               | 0.589    | 4.23E-04         |
| 2.73          | 0.039                               | 0.652                               | 0.701    | 8.04E-05         |
| 2.95          | 0.212                               | 0.614                               | 0.594    | 2.89E-04         |
| 3.19          | 0.000                               | 0.701                               | 0.795    | 2.32E-05         |
| 3.45          | 0.234                               | 0.582                               | 0.609    | 2.07E-04         |

**Table SI3.** Complex **1** energy spectrum and  $g$  tensors of exchange states as arising from experimental magnetization data and *ab-initio* calculations. Possible pseudo doublets assignments are remarked in bold type.

| Exp<br>cm <sup>-1</sup> | $g$ -tensors<br>$g_x, g_y, g_z$ | $J_1 < 0$<br>$J_2 < 0$<br>cm <sup>-1</sup> | $g$ -tensors<br>$g_x, g_y, g_z$ | $J_1 < 0$<br>$J_2 > 0$<br>cm <sup>-1</sup> | $g$ -tensors<br>$g_x, g_y, g_z$ | $J_1 > 0$<br>$J_2 < 0$<br>cm <sup>-1</sup> | $g$ -tensors<br>$g_x, g_y, g_z$ |
|-------------------------|---------------------------------|--------------------------------------------|---------------------------------|--------------------------------------------|---------------------------------|--------------------------------------------|---------------------------------|
| <b>0.0</b>              | 0.0 0.0 0.0                     | 0.0                                        | -                               | 0.0                                        | -                               | 0.0                                        | -                               |
| <b>0.0</b>              |                                 | 6.0                                        | -                               | 11.7                                       | -                               | 9.7                                        | -                               |
| <b>13.3</b>             | 0.0 0.0 4.52                    | 7.6                                        | -                               | <b>14.6</b>                                | 0.0 0.0 0.0                     | <b>17.8</b>                                | 0.0 0.0 0.0                     |
| <b>13.5</b>             |                                 | <b>10.7</b>                                | 0.0 0.0 0.0                     | <b>16.0</b>                                |                                 | <b>22.3</b>                                |                                 |
| <b>18.3</b>             | 0.0 0.0 10.1                    | <b>11.1</b>                                |                                 | <b>23.7</b>                                | 0.0 0.0 0.0                     | <b>31.7</b>                                | 0.0 0.0 0.0                     |
| <b>18.4</b>             |                                 | <b>16.2</b>                                | 0.0 0.0 2.79                    | <b>24.7</b>                                |                                 | <b>32.2</b>                                |                                 |
| 21.5                    | -                               | <b>16.6</b>                                |                                 | <b>26.1</b>                                | 0.0 0.0 0.0                     | 46.4                                       | -                               |
| 22.3                    | -                               | <b>20.7</b>                                | 0.0 0.0 0.0                     | <b>26.4</b>                                |                                 | 54.9                                       | -                               |
| 27.8                    | -                               | <b>21.3</b>                                |                                 | <b>34.8</b>                                | 0.0 0.0 9.03                    | <b>65.2</b>                                | 0.0 0.0 0.0                     |
| 28.3                    | -                               | 26.9                                       | -                               | <b>35.4</b>                                |                                 | <b>72.1</b>                                |                                 |
| <b>35.5</b>             | 0.0 0.0 0.0                     | <b>28.7</b>                                | 0.0 0.0 0.0                     | 39.1                                       | -                               | <b>77.6</b>                                | 0.0 0.0 0.0                     |
| <b>36.1</b>             |                                 | <b>29.1</b>                                |                                 | 42.0                                       | -                               | <b>82.1</b>                                |                                 |
| <b>52.4</b>             | 0.0 0.0 0.0                     | 31.8                                       | -                               | <b>45.6</b>                                | 0.0 0.0 0.0                     | <b>98.7</b>                                | 0.0 0.0 0.0                     |
| <b>52.4</b>             |                                 | <b>33.4</b>                                | 0.0 0.0 3.99                    | <b>46.4</b>                                |                                 | <b>100.1</b>                               |                                 |
| 61.3                    | -                               | <b>34.7</b>                                |                                 | 50.1                                       | -                               | 107.4                                      | -                               |
| 62.0                    | -                               | 37.5                                       | -                               | 54.5                                       | -                               | 133.9                                      | -                               |

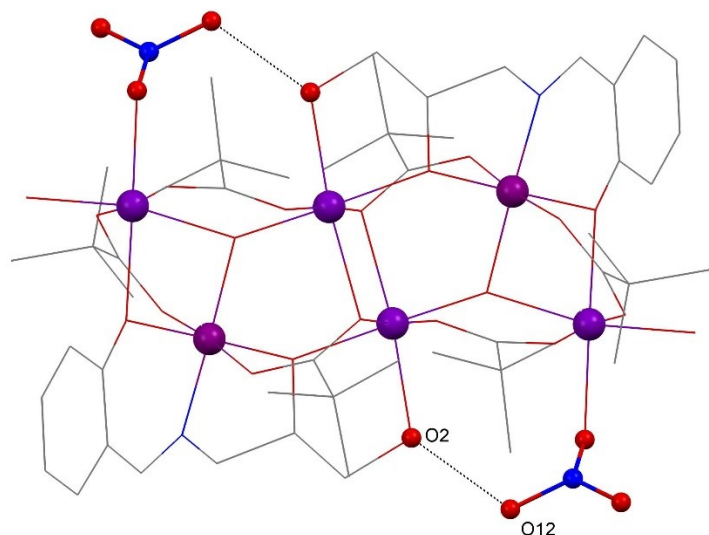

**Figure S11.** Ball & stick/ wireframe molecular representation of complex **1** in crystal structure showing the intra-molecular H -interaction pattern. H atoms have been removed for sake of visualization clarity. Violet: Co(II); Purple: Co(III); Red: O; Blue: N; Grey: C.

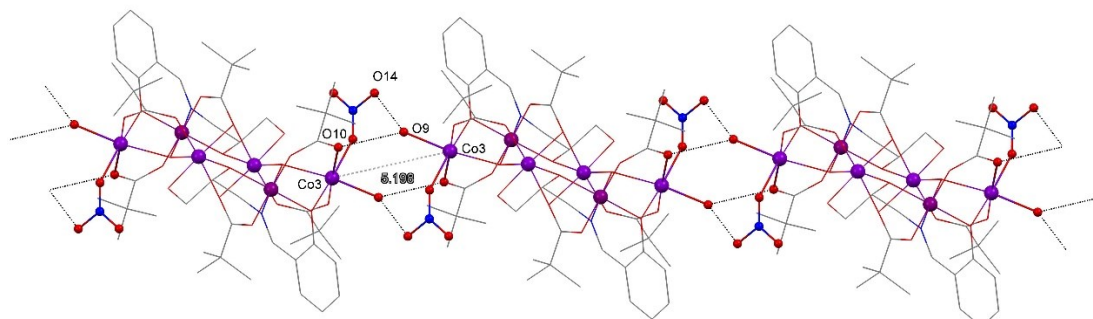

**Figure S12.** Ball & stick/ wireframe molecular representation of complex **1** showing the inter-molecular H- interaction network in the crystal structure as well as the closest Co...Co inter-molecular distance in Å. H atoms have been removed for sake of visualization clarity. Violet: Co(II); Purple: Co(III); Red: O; Blue: N; Grey: C.

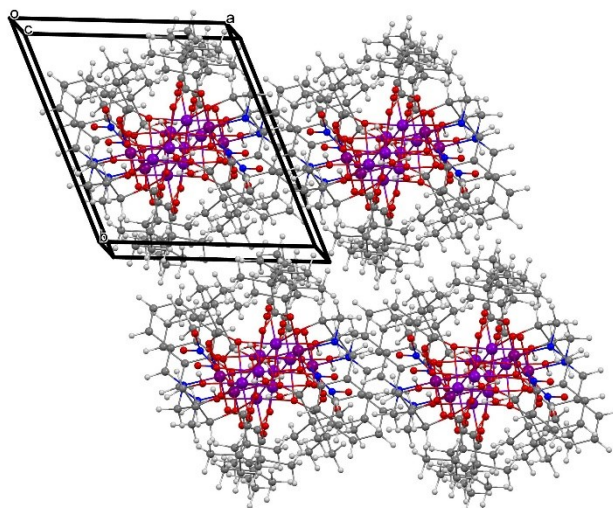

**Figure SI3.** Ball & stick molecular representation of complex **1** crystal packing along  $c$ -axis. H atoms have been removed for sake of visualization clarity. Violet: Co(II); Purple: Co(III); Red: O; Blue: N; Grey: C.

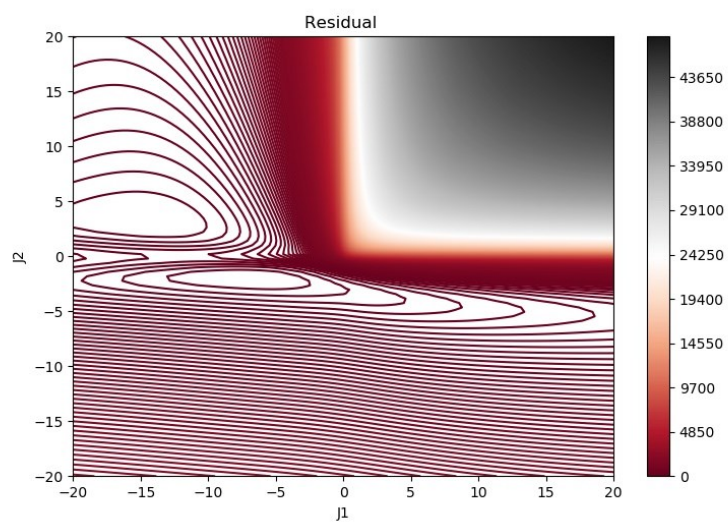

**Figure SI4.**  $\chi^2$  vs  $T$  data fitting residuals contour plot showing the two minima corresponding to two different best fitting parameters sets.

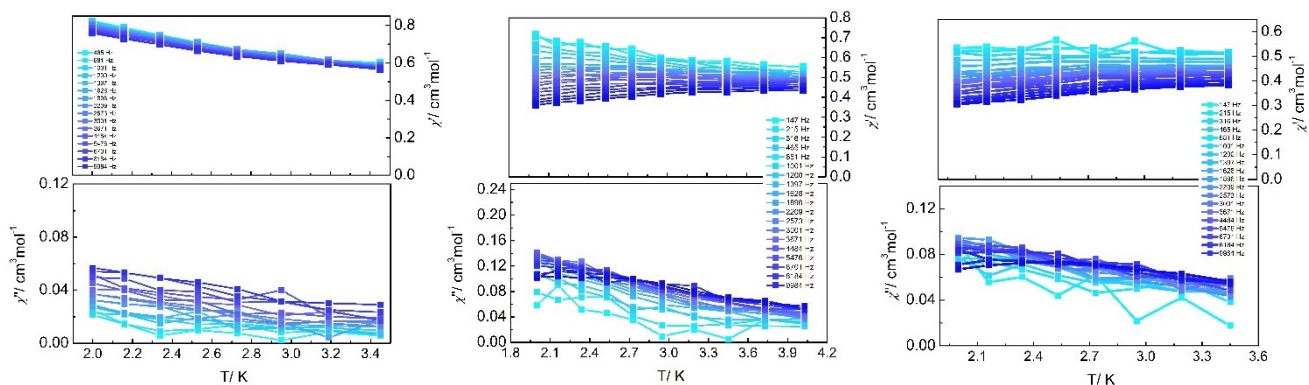

**Figure S15.** AC magnetic susceptibility vs temperature data of complex **1** at external static fields of: 0 Oe (left), 1500 Oe (middle) and 3000 Oe (right) at driving frequencies in the range 0-10000 Hz. Full symbols: experimental data; Full lines are only for eyes guideline.

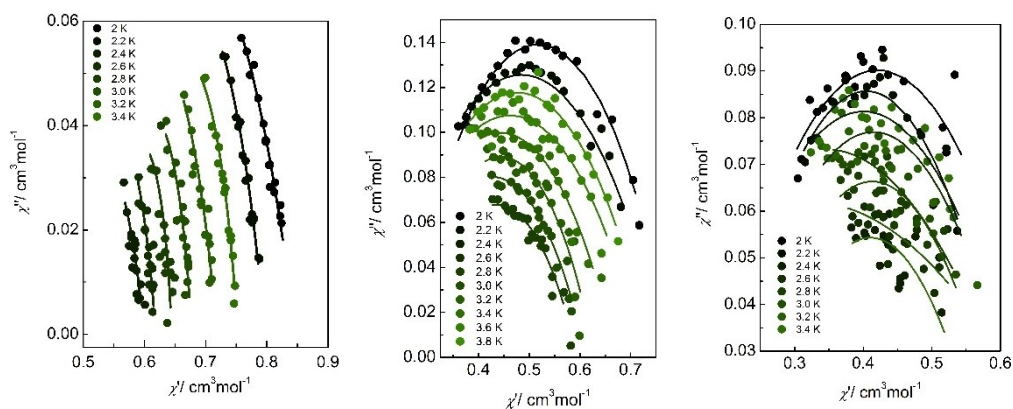

**Figure S16.** AC magnetic susceptibility data Cole-Cole plots of complex **1** at external static fields of: 0 Oe (left), 1500 Oe (middle) and 3000 Oe (right) in the range 2 - 4 K. Full symbols: experimental data; Full lines: simulation with best fitting parameters according to a generalized Debye model for one relaxation process.

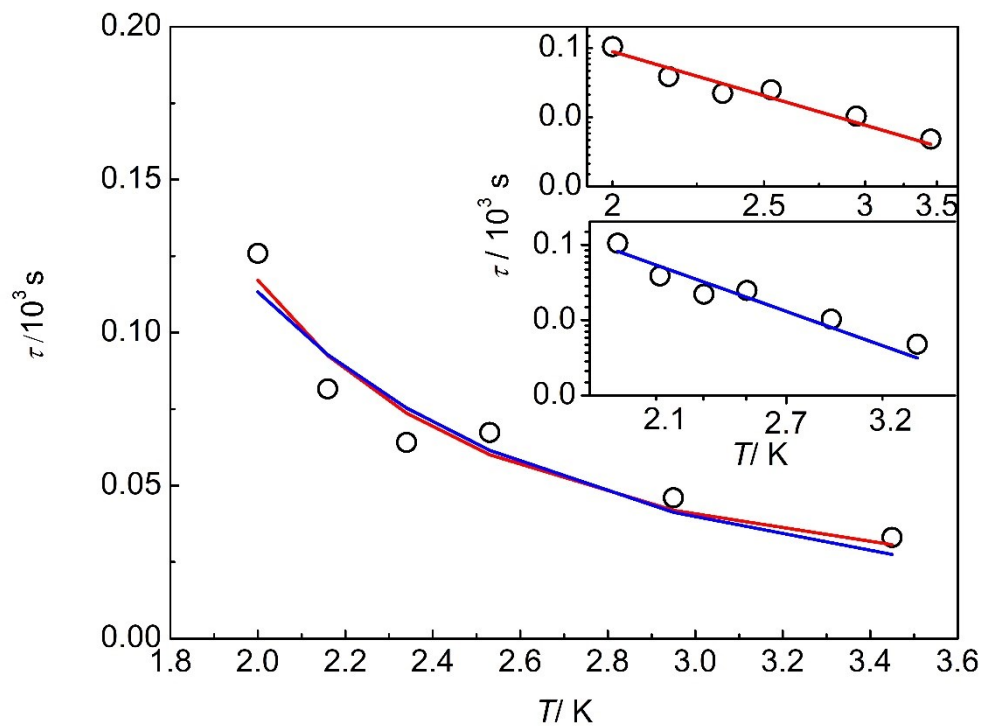

**Figure SI7.** Complex **1** characteristic magnetization relaxation time temperature dependence at 3000 Oe. Open circles: experimental data; full lines simulated: Orbach (blue); Raman (red). Inset:  $\ln \tau$  vs  $T^{-1}$  scales (top);  $\ln \tau$  vs  $\ln T$  (bottom).

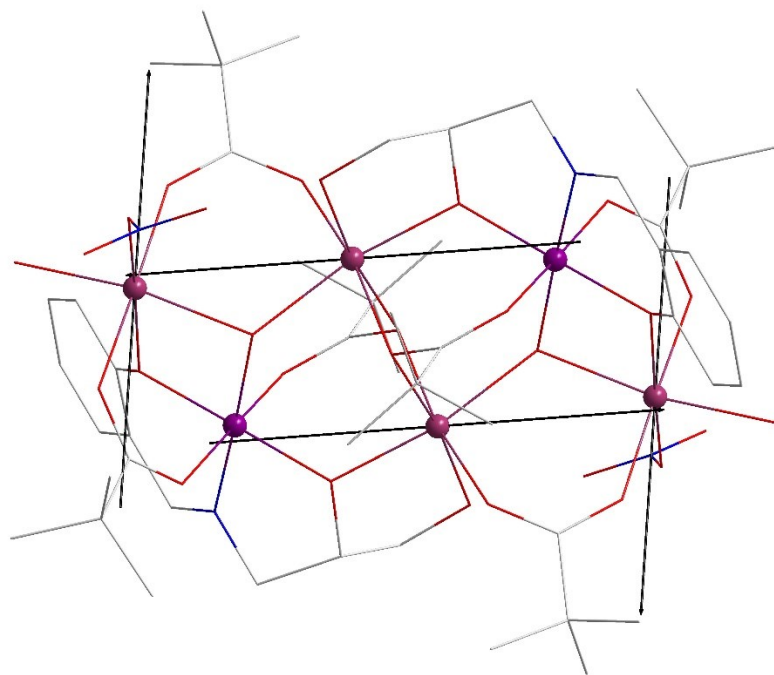

**Figure S18.** Complex **1** *ab-initio* calculated main magnetic axis orientation at local Co(II) sites (black).

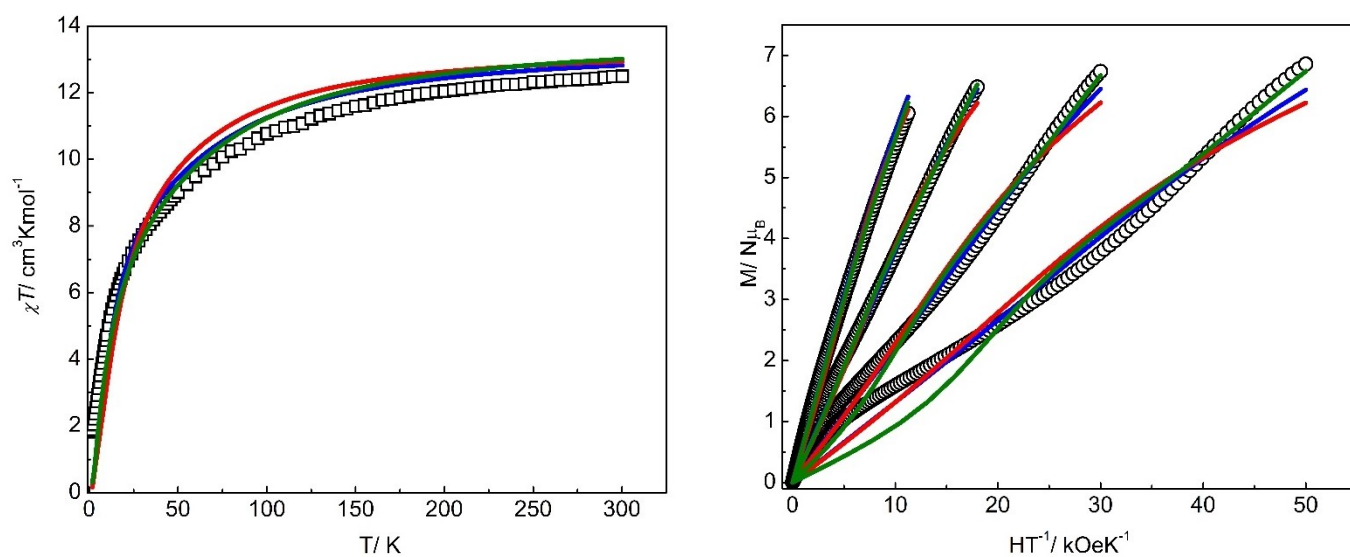

**Figure S19.** Left :  $\chi T$  vs  $T$  plot measured at 1 kOe external magnetic field of complex **1**. Right: Reduced magnetization plot. Open symbols: experimental data; full line: simulation with best fitting parameters with POLY\_ANISO;  $J_1$  and  $J_2 < 0$  (green),  $J_1 < 0$  and  $J_2 > 0$  (blue) and  $J_1 > 0$  and  $J_2 < 0$  (red).



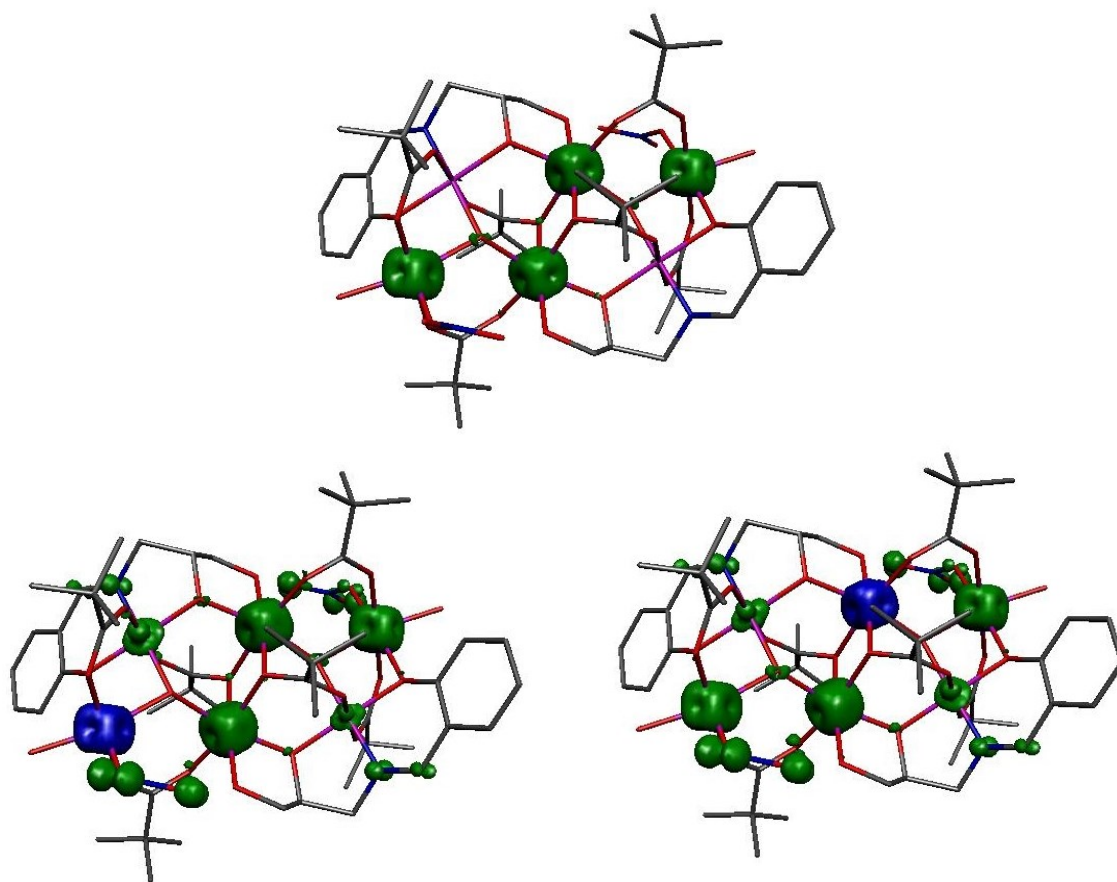

**Figure SI10.** Spin density iso-surfaces (0.03 a. u.), as arising from BS calculations of complex **1** (see details in text). Top: HS state; Bottom: BS states (left, BS1; right BS2) converged after sequentially flipping both symmetries distinct Co(II) sites.

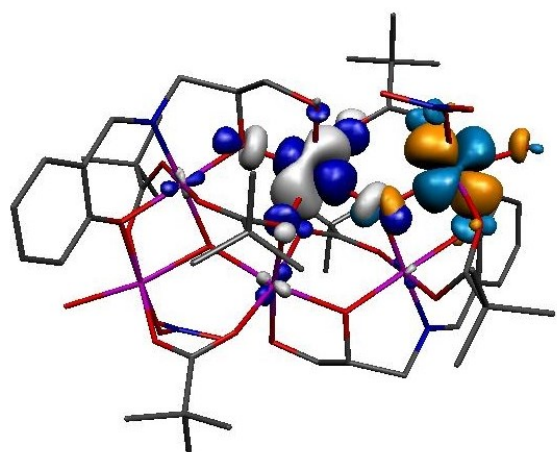

$$S_{\alpha\beta} = 0.06220$$

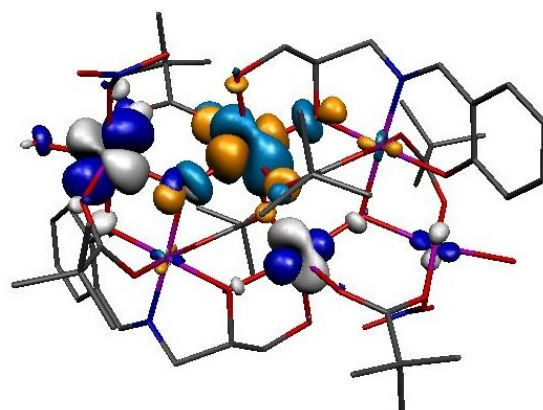

$$S_{\alpha\beta} = 0.05637$$

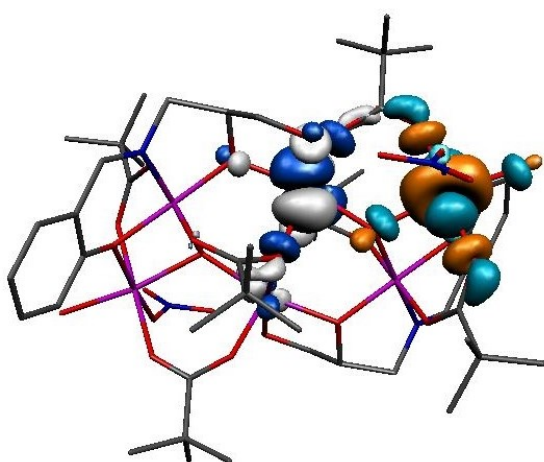

$$S_{\alpha\beta} = 0.03266$$

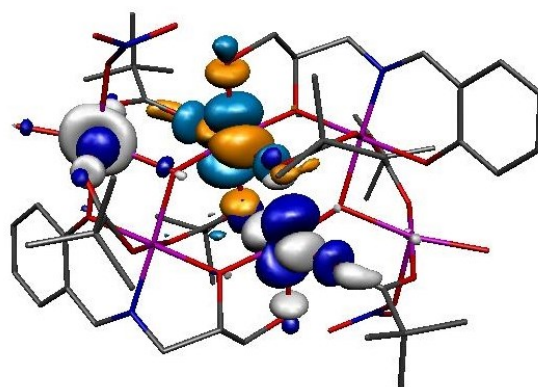

$$S_{\alpha\beta} = 0.01654$$

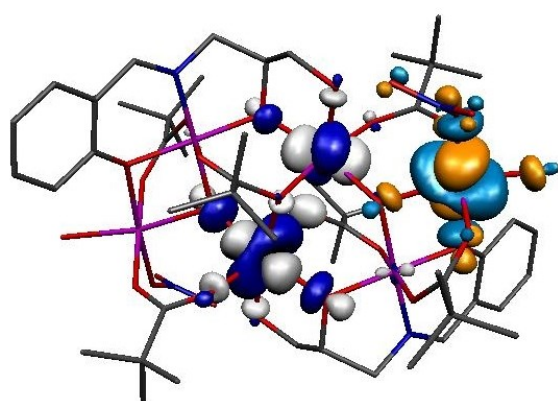

$$S_{\alpha\beta} = 0.00928$$

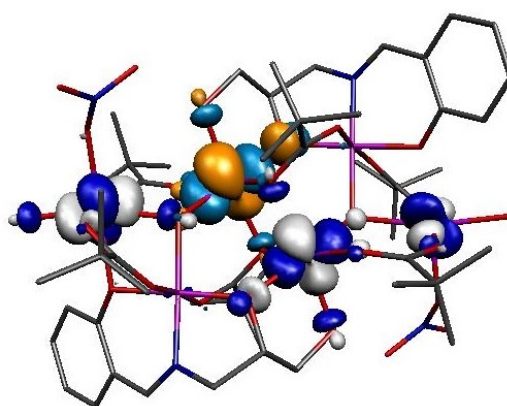

$$S_{\alpha\beta} = 0.00720$$

**Figure S11.1.** Magnetic orbitals overlap ( $S_{\alpha\beta}$ ) as arising from a COT transformation. Iso-surfaces (0.03 a. u.), as arising from BS calculations of complex 1 (see details in text; left, BS1; right BS2).
